# Supplementary material
Source: publisher figshare collection journal article supplement (https://acs.figshare.com/ndownloader/files/4116268)

**Supporting Information.****Supplementary Figures:**

**Figure 1S.** Drift times for the singly, doubly and triply protonated peptides selected for inclusion in QCAL-IM, following tryptic proteolysis of a set of 'standard' proteins.

**Figure 2S.** Peptide map of QCAL-IM following proteolytic cleavage using either trypsin or Lys-C; included are the peptide numbers and the  $m/z$  values of the doubly protonated peptide ions.

**Figure 3S.** Linear regression comparing measured  $\Omega$  of doubly charged peptide ions on both the modified Synapt and Q-TOF linear field mobility instruments.

This material is available free of charge via the Internet at <http://pubs.acs.org>.

Figure 1S.

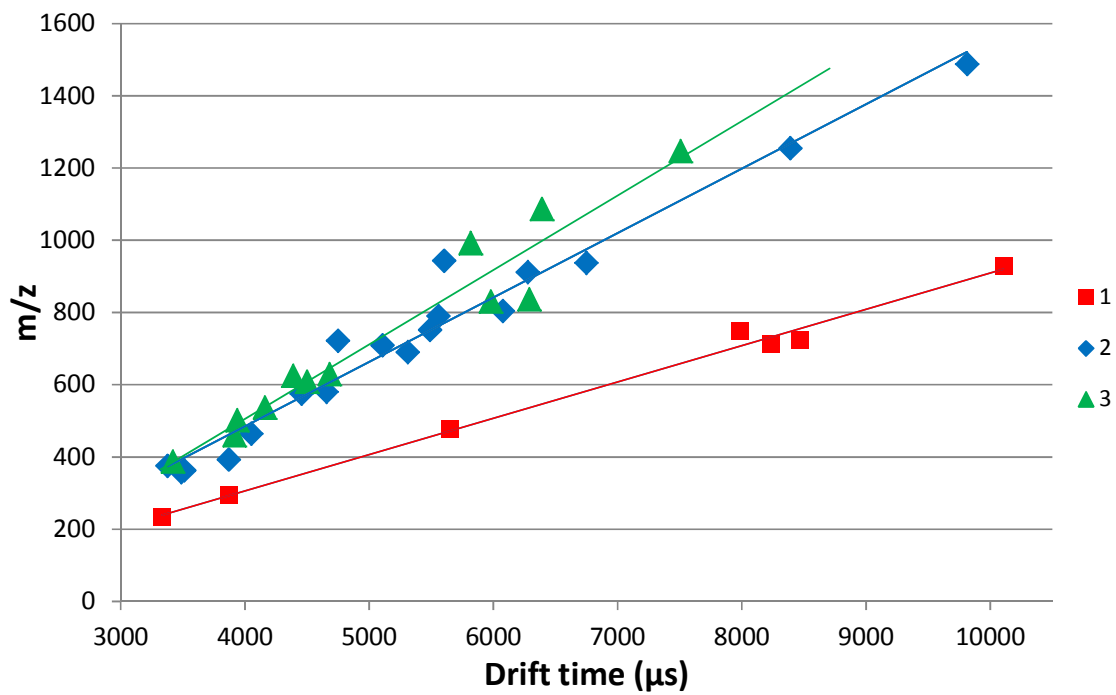

Figure 2S.

## QCAL-IM: 368amino acids, ~39.3kDa

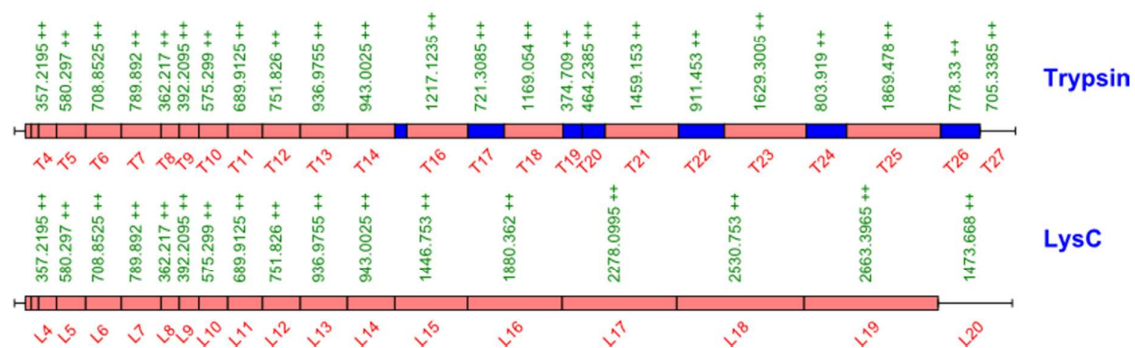

Figure 3S.

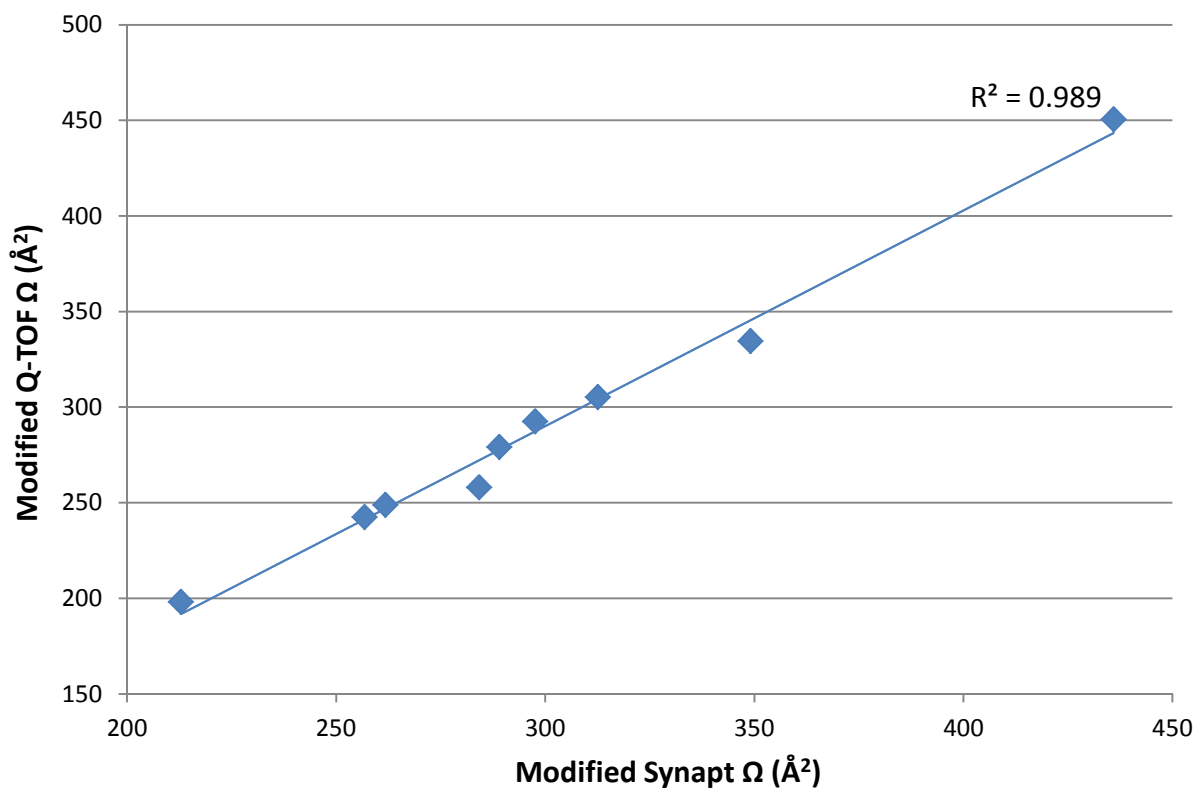

Supplement: Supplementary file 1 [file 4116268]
